# Supplementary material
Source: MDPI journal article supplement (https://www.mdpi.com/2673-9976/4/1/78)

# Partial rootzone drying irrigation modulates transpiration of olive trees

**Anabela Fernandes-Silva <sup>1,2\*</sup>, António Esteves <sup>2</sup>, Manuela Correia <sup>3</sup> and Francisco Santos <sup>4</sup>**

<sup>1</sup> Centre for Research and Technology of Agro-Environment and Biological Sciences (CITAB), University of Trás-os-Montes e Alto Douro (UTAD), Quinta dos Prados, 5000-801 Vila Real, Portugal;

<sup>2</sup> Agronomy Department, School of Agrarian and Veterinary Sciences, University of Trás-os-Montes e Alto Douro (UTAD), Quinta dos Prados, 5000-801 Vila Real, Portugal

<sup>3</sup> MED Mediterranean Institute for Agriculture, Environment and Development, Universidade de Évora, Pólo da Mitra, Apartado 94, 7006-554 Évora, Portugal

<sup>4</sup> ICAAM-Instituto de Ciências Agrárias e Ambientais Mediterrânicas, Universidade de Évora, Núcleo da Mitra, Ap. 94, 7002-554 Évora, Portugal.

\* Corresponding author: [anaaf@utad.pt](mailto:anaaf@utad.pt)

**Abstract:** Water scarcity and the increasing water demand for irrigation in olive orchards are leading to adopt deficit irrigation approaches to save water. The partial rootzone drying (PRD) irrigation technique has been proposed for woody crops as an agronomic practice to improve water productivity. This study was conducted to evaluate the effect of this irrigation strategy on water relations and transpiration of olive tree (cv. Cobrançosa) under climate conditions of the Northeast of Portugal, during the season of 2014. Two irrigation treatments were used: control (FI), irrigated with 100% of the estimated crop evapotranspiration (ET) and PRD<sub>50</sub>, irrigated with 50% of the control (FI) on one side switching every two weeks. Whole tree transpiration (T) was quantified by sap flow, that was monitored within the trunk of both the control (FI) and deficit irrigated (PRD<sub>50</sub>) trees using the compensation heat-pulse technique. Foliage gas exchange and water potentials were determined throughout the experimental period. During summer, daily transpiration reached roughly 27 and 43 L d<sup>-1</sup> for PRD<sub>50</sub> and FI olive trees, respectively, with a clear reduction of 37% in PRD<sub>50</sub> olive trees. PRD<sub>50</sub> showed statistically comparable values of water potentials to the Control which seemed to prevent an excessive drop in tree water status by modulating stomatal closure.

**Keywords:** *Olea europaea* L., deficit irrigation, water relations, sap flow, heat pulse

# Results and Discussion

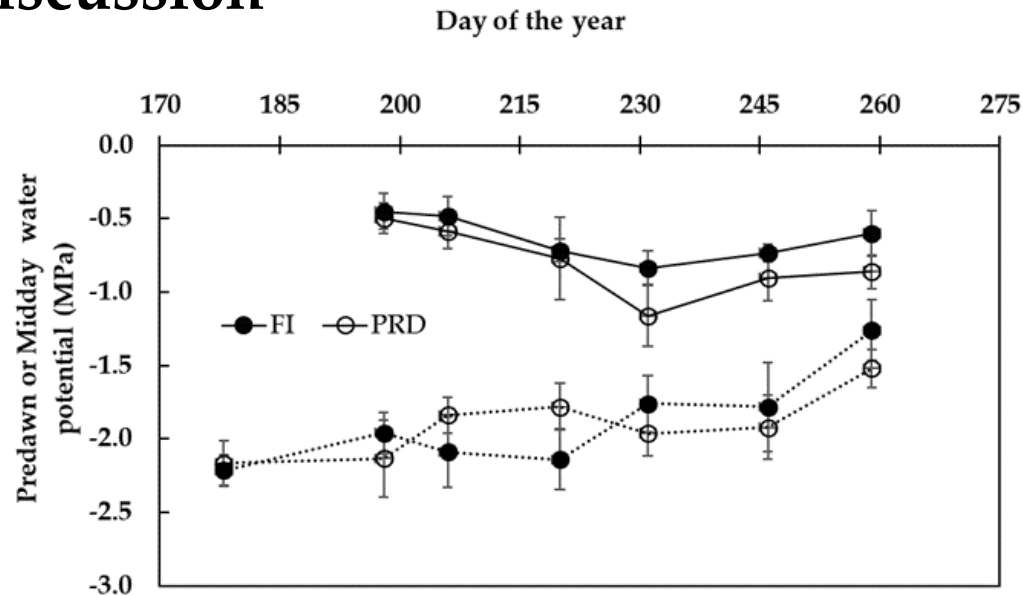

Predawn values of water potential showed slight differences between FI and PRD treatments only in DOY 231 in which  $\Psi_{PD}$  of PRDI plants attained a minimum of -1.16 MPa (Figure 3). For FI trees values were higher of -0.65 MPa whereas for PRD plants they were usually higher than -0.80 MPa. Stem water potential was not significantly affected by PRD that had values similar to FI plants, in general higher than -2.0 MPa.

## Results and Discussion

Averaged daily transpiration showed with maximum values at the end of daily reference evapotranspiration was similar between treatments. However, showed invariably lower daytime sap flow rates than full irrigated plants. Values of transpiration in FI plants ranged from 16 to 39.9 L d<sup>-1</sup> respectively at DOY 265 (ET<sub>o</sub> = 1.9 mm d<sup>-1</sup>) and 209 (ET<sub>o</sub> = 7.6 mm d<sup>-1</sup>), while in PRD plants a minimum of 13.1 L d<sup>-1</sup> and a maximum of 27.3 L d<sup>-1</sup> was attained in the same dates. A good agreement between measures daily water use and daily reference evapotranspiration was observed for both treatments ( $P < 0.05$ ) with a coefficient of determination ( $r^2$ ) of 0.74 for FI and 0.68 for PRD, though the slope of the regression was significantly higher in FI plants compared to PRD trees.

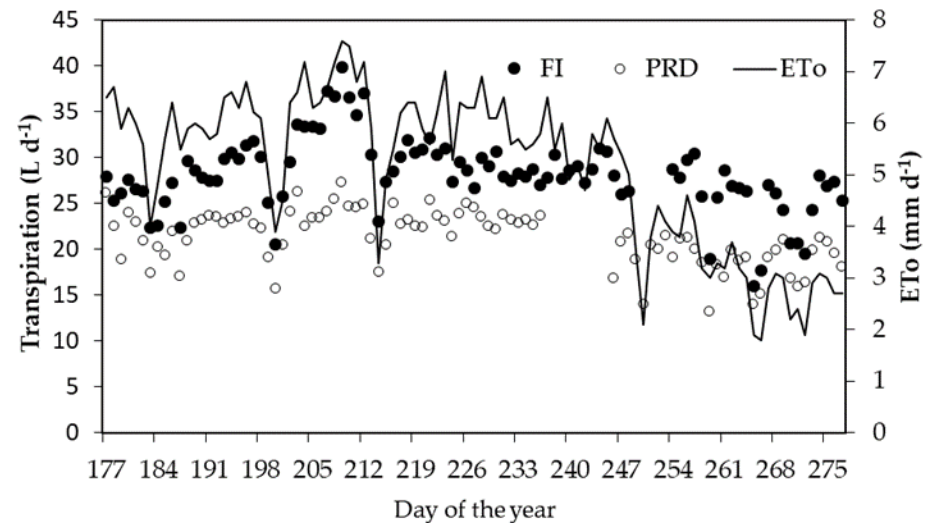

## Conclusions

Preliminary results of this study done in field grown olive trees showed that partial rootzone drying irrigation did not affect plant water relations, as expressed by bulk leaf water potential, when the total amount of water supplied to these adult olive trees was 50% of that supplied to Control plants. Stomatal closure observed in PRD plants affects water use in PRD<sub>50</sub> plants showed by a clear reduction of sap flow and transpiration of mature olive trees. The coordinated adjustment in stomatal responses may represent an adaptive advantage in conditions of water deficit induced by PRD irrigation. Further research is needed to understand the long term yield and water use efficiency response of Cv. Cobrançosa to this irrigation strategy.

# Acknowledgments

This work was supported by National Funds by FCT- Portuguese Foundation for Science and Technology, under the project UIBD/04003/2020 and by project [Grant number PA 44662 IF0019] of PRODER program of the Portuguese Ministry of Agriculture.

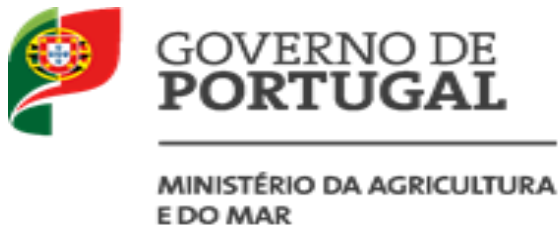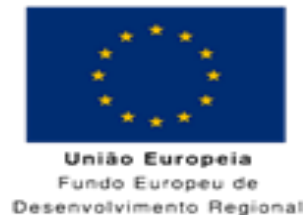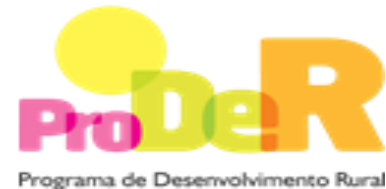

Supplement: s1 [file s1]
